# Supplementary material for: Reduction in Subtypes and Sizes of Myocardial Infarction With Ticagrelor in PEGASUS–TIMI 54
Source: PubMed Central journal article supplement — J Am Heart Assoc. 2018 Nov 20;7(22):e009260. doi: 10.1161/JAHA.118.009260 (PMC6404436; doi:10.1161/jaha.118.009260), 2018-11-20

# **Supplemental Material**

**Table S1. Baseline Characteristics by Recurrent Myocardial Infarction.**

| <b>Characteristic</b>                      | <b>No MI<br/>N=20,264</b> | <b>MI<br/>N=898</b>    | <b>p-value</b> |
|--------------------------------------------|---------------------------|------------------------|----------------|
| Age, mean (SD)                             | 65.3 (8.32)               | 66.2 (9.02)            | 0.0027         |
| Female, n(%)                               | 4842 (23.89%)             | 218 (24.28%)           | 0.7931         |
| Body Mass Index, median (range)            | 27.8<br>(25.14, 31.14)    | 28.4<br>(25.31, 31.59) | 0.0248         |
| SBP (mmHg), mean (SD)                      | 132.5 (16.89)             | 135.1 (18.72)          | 0.0002         |
| History Hypertension, n (%)                | 15660 (77.29%)            | 747 (83.18%)           | <.0001         |
| History of Hypercholesterolaemia, n (%)    | 15540 (76.7%)             | 701 (78.06%)           | 0.3452         |
| Current Smoker, n (%)                      | 3347 (16.52%)             | 189 (21.05%)           | 0.0004         |
| History of Diabetes, n (%)                 | 6439 (31.78%)             | 367 (40.87%)           | <.0001         |
| eGFR < 60 (MDRD), n (%)                    | 4570 (22.84%)             | 279 (31.38%)           | <.0001         |
| History of PAD, n (%)                      | 1057 (5.22%)              | 86 (9.58%)             | <.0001         |
| History of Atrial Fibrillation, n (%)      | 809 (3.99%)               | 58 (6.46%)             | 0.0003         |
| History of CHF, n (%)                      | 4005 (19.77%)             | 221 (24.61%)           | 0.0004         |
| Prior Angina, n (%)                        | 6196 (30.58%)             | 359 (39.98%)           | <.0001         |
| Multivessel Coronary Artery Disease, n (%) | 11959 (59.03%)            | 599 (66.7%)            | <.0001         |
| History of Second Prior MI, n (%)          | 3201 (15.8%)              | 298 (33.18%)           | <.0001         |
| Prior CABG, n (%)                          | 842 (4.16%)               | 133 (14.81%)           | <.0001         |
| History of PCI with stenting, n (%)        | 16184 (80.15%)            | 707 (78.82%)           | 0.3296         |
| Prior PCI with DES (1=Yes, 0=No), n (%)    | 7880 (48.69%)             | 409 (57.85%)           | <.0001         |
| Qualifying MI: NSTEMI, n (%)               | 8124 (40.14%)             | 459 (51.11%)           | <.0001         |
| <i>Region</i>                              |                           |                        | <.0001         |
| North America, n (%)                       | 3680 (18.16%)             | 227 (25.28%)           |                |
| South America, n (%)                       | 2372 (11.71%)             | 86 (9.58%)             |                |
| Western Europe (incl. S Af), n (%)         | 5847 (28.85%)             | 291 (32.41%)           |                |
| Eastern Europe, n (%)                      | 6066 (29.93%)             | 224 (24.94%)           |                |
| Asia/Australia/New Zealand, n (%)          | 2299 (11.35%)             | 70 (7.8%)              |                |

SD-standard deviation, mmHG-millimeters of mercury, eGFR-estimated glomerular filtration rate, MDRD-Modification of Diet in Renal Disease, PAD-peripheral artery disease, CHF-congestive heart failure, MI-myocardial infarction, CABG-coronary artery bypass grafting surgery, PCI-percutaneous intervention, DES-drug eluting stent, NSTEMI-non-ST elevation myocardial infarction

Figure S1. Cumulative incidence of myocardial infarction subtypes occurring in patients randomized to placebo (on aspirin monotherapy) during follow up.

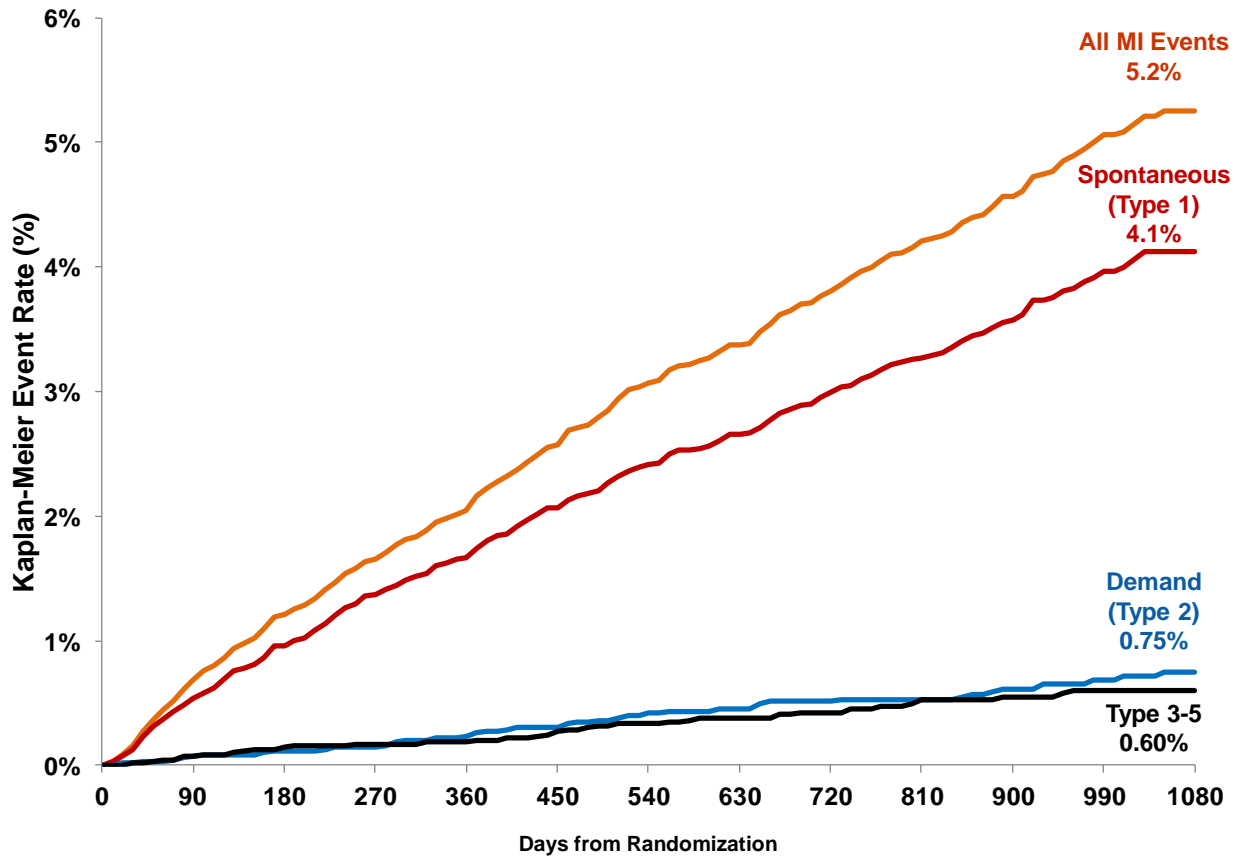

Figure S2. Ticagrelor and fatal myocardial infarction, sudden cardiac death and the composite of both.

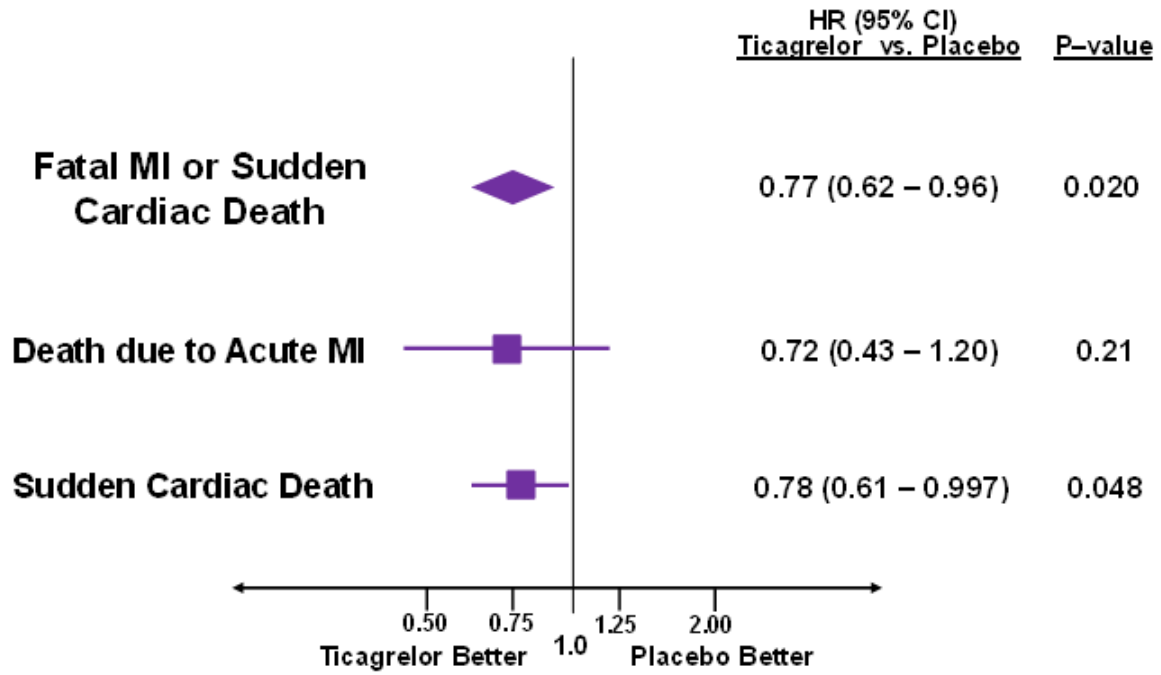

Supplement: JAH3-7-e009260-s001.pdf [file JAH3-7-e009260-s001.pdf]
